# Supplementary material
Source: PubMed Central journal article supplement (PMC3475145)
Supplement: Supp_Fig1.pdf [file Supp_Fig1.pdf]

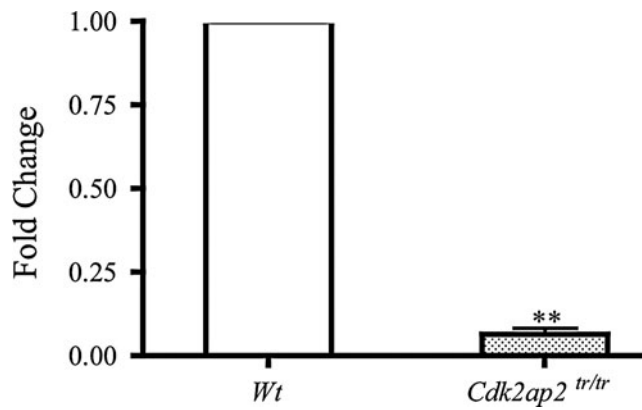

**SUPPLEMENTARY FIG. S1.** RT-qPCR analyses of *Cdk2ap2* expression. RT-qPCR analysis to detect mRNA expression revealed a significant reduction of *Cdk2ap2* expression in the *Cdk2ap2*<sup>tr/tr</sup> mESCs. \*\* $P < 0.05$ . RT-qPCR, reverse transcriptase-quantitative polymerase chain reaction; mESCs, mouse embryonic stem cells.
