# Supplementary material
Source: PubMed Central journal article supplement (PMC3475145)
Supplement: Supp_Fig2.pdf [file Supp_Fig2.pdf]

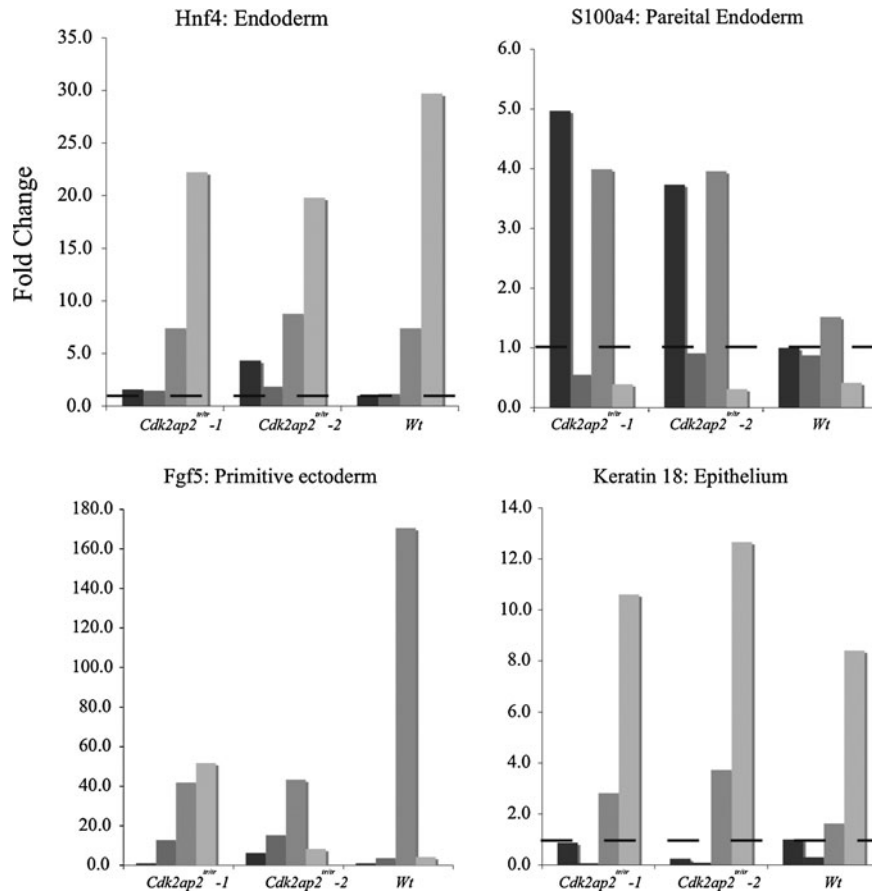

**SUPPLEMENTARY FIG. S2.** Expression analyses of additional lineage markers during differentiation of *Wt* and *Cdk2ap2*<sup>tr/tr</sup> mESCs. Levels of the endoderm lineage marker *S100a4* were observed to be upregulated in the absence of *Cdk2ap2* expression, but observed no difference in *Hnf4*. No significant difference was observed in the expression of ectoderm (*Fgf5*) and epithelial (*Keratin 18*) markers.
