# Supplementary material
Source: PubMed Central journal article supplement (PMC3475145)
Supplement: Supp_Fig3.pdf [file Supp_Fig3.pdf]

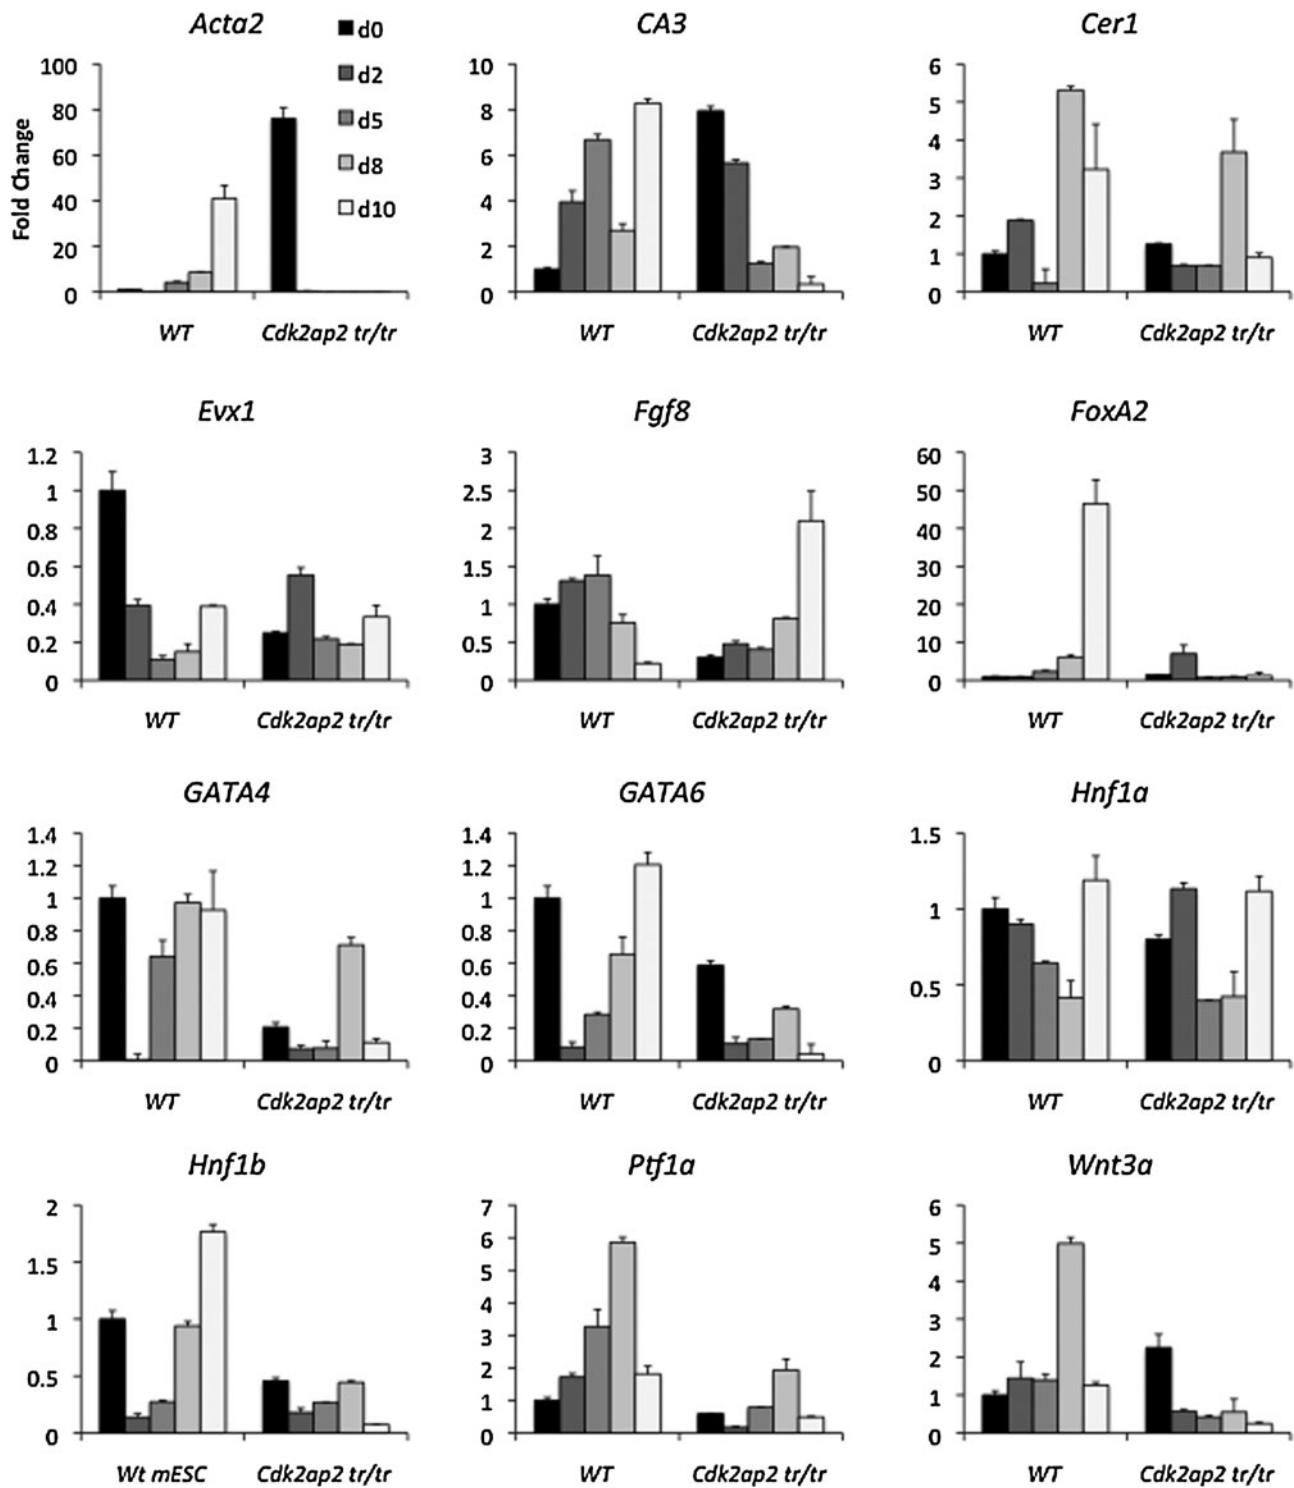

SUPPLEMENTARY FIG. S3. Expression analyses of endoderm and mesoderm lineage markers during differentiation of Wt and *Cdk2ap2<sup>tr/tr</sup>* mESCs. Endoderm and mesoderm markers were further tested in this figure. These markers had a different expression profile between the Wt and the *Cdk2ap2<sup>tr/tr</sup>* mESCs. Markers such as Acta2 and CA3 had higher expression profiles in the knockout than the Wt at a sooner timepoint. Other markers such as Cer1 and Hnf1a have a similar profile between the Wt and knockout.
